1 **Dynamics of Hepatitis C Virus Seroprevalence: Evaluating Risk Factors**  
2 **among Pakistan's Sex Workers**

3 Raza Tirmizi<sup>1,2</sup>, Rida Rashid<sup>2</sup>, & Nousheen Zaidi<sup>3,4\*</sup>

4 <sup>1</sup>Dostana Male Health Society, Pakistan

5 <sup>2</sup>Action Research Collective

6 <sup>3</sup>Cancer Biology Lab, Institute of Microbiology and Molecular Genetics, University of the Punjab, Pakistan, <sup>4</sup>Cancer  
7 Research Centre, University of the Punjab, Pakistan

8

9

10 \*Corresponding Author

11 Email: [director.crc@pu.edu.pk](mailto:director.crc@pu.edu.pk) (NZ)

## 12 **Abstract**

13 The current study investigates the seroprevalence of the Hepatitis C Virus (HCV) among sex workers in  
14 Pakistan, a task made challenging due to social and cultural barriers. Our primary objectives were to  
15 gauge the extent of HCV exposure in this marginalized group, identify disparities in seroprevalence  
16 between sexes, and examine the association between seropositivity and various demographic and risk  
17 factors. We enrolled 1,000 participants, predominantly male (87.7%) and female (12.3%) sex workers.  
18 The majority fell within the 26-35 years age category (39.9%). A significant proportion (47.1%) had not  
19 received formal education. Overall, HCV antibodies were found in 15% of the participants. Disparities  
20 were evident with a seroprevalence of 13% in male sex workers and a significantly higher 31% in female  
21 sex workers. HCV seropositivity increased with age, with female sex workers showing a sharper rise. A  
22 link between levels of formal education and HCV seroprevalence was observed, with female sex workers  
23 consistently exhibiting higher seroprevalence across educational levels. Risk factors such as shaving  
24 practices, sharing of blades, surgical history, and other medical exposures were assessed, revealing higher  
25 HCV seropositivity rates among those exposed, especially pronounced among female participants.  
26 Despite the societal challenges, this research paves the way for future investigations and interventions  
27 tailored to this population's unique needs and vulnerabilities.

28

## 29 **Keywords**

30 HCV; Seroprevalence; HCV risk factors; Sex workers

## 31 **Introduction**

32 Hepatitis C virus (HCV) infection remains a significant global health concern, exhibiting considerable  
33 prevalence variations across diverse populations and geographical regions (1-5). This variability is  
34 attributed to multiple factors, including disparities in socioeconomic conditions, accessibility to  
35 healthcare services, and the availability of harm reduction programs (6, 7). Predominantly, HCV infection  
36 affects two age demographics: individuals aged 20-40 years and those over 50 years (8-11).

37 Transmission of HCV is primarily through exposure to contaminated blood, occurring through means  
38 such as contaminated surgical instruments, blood transfusions, and sharing needles or syringes (2, 12).  
39 While the risk of sexual transmission is generally lower, it is notably elevated among certain populations,  
40 including sex workers (13-15), due to risk behaviors that facilitate acquiring and transmitting these  
41 viruses through sexual and parenteral routes (2, 13).

42 Previous research shows significant disparities in HCV prevalence among sex workers across various  
43 regions and demographics. For instance, a study conducted in Glasgow highlighted an alarming 81%  
44 HCV seroprevalence among female sex workers who inject drugs, significantly surpassing the rates for  
45 general injecting drug users in Glasgow and any recorded in the UK from 1991 to 2005 (15). Conversely,  
46 a Canadian study reported a baseline prevalence of 42.7% among female sex workers. This study also  
47 showed that HCV incidence was highest among women who inject drugs. They also reported higher HCV  
48 prevalence among women living with sexually transmitted infections or HIV. Moreover, the use of non-  
49 injection stimulants was found to be associated with HCV seroconversion (14). Other studies also  
50 reported varying prevalence rates and associated risk factors, emphasizing the diverse nature of HCV  
51 prevalence among sex worker populations globally (16, 17).

52 In Pakistan, a nation confronting one of the most substantial burdens of HCV, the vulnerability of male  
53 and female sex workers is accentuated. Nevertheless, a pronounced void exists in exhaustive research  
54 dedicated to these demographics, notably in an environment characterized by significant impediments to

55 education and healthcare. With a staggering approximation of 10 million individuals living with HCV in  
56 Pakistan, the dearth of intricate data on HCV seroprevalence within the sex worker community is palpable  
57 (18-20).

58 To bridge this informational gap, the presented work aimed to study the HCV seroprevalence among male  
59 and female sex workers and examine the associated risk factors. The undertaking of research within such  
60 marginalized communities as the sex workers in Pakistan mandated an approach imbued with  
61 collaboration and empathy. To this end, we established a partnership with *Dostana*, an organization  
62 steadfastly dedicated to the empowerment and health advocacy of vulnerable communities. This alliance  
63 enabled an effective and considerate engagement with the sex worker community in Pakistan, ensuring  
64 the study was conducted with due deference while addressing the distinctive needs and challenges faced  
65 by this community.

## 66 **Methodology**

### 67 **Research Design and Participant Selection**

68 This cross-sectional study determines the seroprevalence of the Hepatitis C Virus (HCV) among sex  
69 workers in Pakistan. A total of 1000 participants, male and female, were included in this study. The  
70 inclusion criteria stipulated that participants must be sex workers aged 15 years or older and possess  
71 proficiency in Punjabi or Urdu. Participants were recruited through the *Dostana Male Health Society*, a  
72 recognized society that addresses key populations' healthcare concerns. Due to Pakistan's societal and  
73 cultural barriers, engaging with individuals in these marginalized communities is challenging. As a  
74 solution, community members were educated and guided to gather data from the sex workers population  
75 enlisted through *Dostana*.

76 The data collection process involved structured interviews. After the necessary training, data enumerators  
77 administered the structured questionnaires through one-on-one interviews. This process of data collection  
78 and participants recruitment took place between 13-06-2022 and 30-03-2023. This method ensured that  
79 the process was consistent, comprehensive, and aimed at minimizing potential bias or misinterpretation of  
80 the questions. The data were collected on demographic characteristics, common risk factors, and history  
81 of HIV.

### 82 **Ethical Considerations**

83 The study protocol is reviewed and approved by the Bioethics Committee of the Cancer Research Centre,  
84 University of the Punjab. All participants provided informed written consent before participating in the  
85 study. The study is conducted following the Declaration of Helsinki.

## 86 **Serological Testing**

87 Blood samples are collected from participants for serological testing. The presence of HCV antibodies is  
88 determined using the SD BIOLINE HCV Hepatitis C Virus Antibody Test. All tests are conducted in a  
89 certified laboratory following standard procedures.

## 90 **Statistical Analysis**

91 Descriptive statistics are used to summarize the demographic characteristics of the participants and the  
92 Prevalence of HCV. All analyses are performed using MS Excel.

## 93 Results

### 94 Demographic Characteristics of the Study Participants

95 The study comprised a total of 1000 participants, with a significant majority being men (87.7%) and a  
96 smaller proportion being women (12.3%) (**Table 1**). The participants spanned a wide age range, with the  
97 largest group falling within the 26-35 years category (39.9%). This was followed by the 18-25 years age  
98 group (25.0%), the 36-45 years age group (20.8%), those older than 45 years (13.3%), and a small  
99 fraction under 18 years (1.0%) (**Table 1**).

100

101

102

103

104

105

106

107

108

109

| Demographic Criteria             | Number of Participants |     |       |
|----------------------------------|------------------------|-----|-------|
|                                  | Total                  | Men | Women |
| <b>Number of Participants</b>    | <b>1000</b>            | 877 | 123   |
| <b>Age Distribution</b>          |                        |     |       |
| <18                              | 10                     | 10  | 0     |
| 18-25                            | 250                    | 238 | 12    |
| 26-35                            | 399                    | 350 | 49    |
| 36-45                            | 208                    | 180 | 28    |
| >45                              | 133                    | 99  | 34    |
| <b>Years of Formal Education</b> |                        |     |       |
| 0                                | 471                    | 399 | 72    |
| ≤8                               | 229                    | 209 | 20    |
| 9-12                             | 229                    | 206 | 23    |
| >12                              | 71                     | 63  | 8     |
| <b>Marital Status</b>            |                        |     |       |
| Married                          | 611                    | 523 | 88    |
| Single                           | 388                    | 353 | 35    |
| <b>HIV Status</b>                |                        |     |       |
| HIV Positive                     | 1                      | 1   | 0     |
| HIV Negative                     | 998                    | 876 | 122   |

110 Regarding years of formal education, a significant proportion of the participants had not received formal  
111 education (47.1%). Those with eight years or less of formal education constituted 22.9% of the  
112 participants, while those with 9-12 years also comprised 22.9% of the total. A small fraction of the

113 participants had more than 12 years of formal education (7.1%). Most participants were married (61.1%),  
114 while a substantial proportion were single (38.8%) (**Table 1**).

115 The study also evaluated the HIV seroprevalence of participants. The vast majority were found to be HIV  
116 negative (99.8%), with only one individual (0.1%) being HIV positive.

## 117 **HCV Seroprevalence of the Study Participants**

118 Next, the seroprevalence of HCV was assessed in this cohort of sex workers. Overall, HCV antibodies  
119 were found in 15% of the population, suggesting that these individuals had been exposed to the virus at  
120 some point (**Fig 1a**).

121 **Fig 1. Prevalence of HCV seropositivity among Pakistani Sex Workers.** (a) A pie-chart displaying  
122 seroprevalence of HCV in overall study population (n=1000). (b) A pie-chart displaying seroprevalence of  
123 HCV in male sex workers population. (c) A pie-chart displaying seroprevalence of HCV in female sex  
124 workers population.

125 When the data is analyzed based on sex, notable disparities become evident. Among male sex workers,  
126 the seroprevalence of HCV was 12%, whereas a significantly higher seroprevalence of 31% was observed  
127 in female sex workers (**Fig 1b-c**).

128 This difference in seroprevalence between male and female sex workers indicates a higher likelihood of  
129 past or present HCV infection among the female participants. However, it is imperative to note the  
130 significantly larger male sample size when interpreting these findings.

## 131 **Association of HCV seroprevalence with selected demographic** 132 **characteristics**

133 Among participants aged less than 18 years, there were no positive cases of HCV detected, however, this  
134 age group only included male participants (**Fig 2a-c**). In the age group of 18-25 years, HCV seropositivity



135 was relatively low in both males (6.4%) and females (8.3%). The seropositivity percentage gradually  
136 increased with age in both sexes. In the 26-35 age bracket, HCV seropositivity increased to 12.8% in  
137 males and 14.3% in females. A more pronounced rise in seropositivity was observed in the 36-45 years  
138 age group, with rates reaching 23.6% in males and 53.6% in females. Similarly, in the age group over 45  
139 years, the seropositivity rate was 22.6% for males and 44.1% for females. These data suggest that HCV  
140 seropositivity increases with age in both sexes, with female sex workers showing a sharper rise and  
141 overall higher seroprevalence than their male counterparts.

142 **Fig 2: Prevalence of HCV seropositivity and associated risk factors in Pakistani sex workers**  
143 **population. (a)** Age-adjusted HCV seroprevalence in overall sex workers population **(b)** Age-adjusted  
144 HCV seroprevalence in male sex workers population **(c)** Age-adjusted HCV seroprevalence in female sex  
145 workers population **(d)** Education-wise HCV seroprevalence in overall sex workers population **(e)**  
146 Education-wise HCV seroprevalence in male sex workers population **(f)** Education-wise HCV  
147 seroprevalence in female sex workers population. The total number of sex workers in each age **(a, b, c)**  
148 and education **(d, e, f)** groups are plotted on left y-axis and represented as verticle gray bars and HCV  
149 seropostivity percentage is plotted on right y-axis and represented as a yellow stacked line.

150 Our data reveal a link between levels of formal education and HCV seroprevalence among the sex  
151 workers in our study. The HCV seroprevalence was 14.2% for participants without formal education (**Fig**  
152 **2d**). Among those with  $\leq 8$  years of education, the seroprevalence rose slightly to 17.0%. For individuals  
153 with 9-12 years of education, the seroprevalence dropped to 13.1%. Interestingly, participants with more  
154 than 12 years of education had a seroprevalence of 14.1%.

155 On analyzing the data based on sex (**Fig 2e-f**), it was noted that male sex workers with no education had a  
156 lower seroprevalence of HCV at 12.0%, whereas the figure for their female counterparts was considerably  
157 higher at 26.4%. In participants with  $\leq 8$  years of education, the seroprevalence was 14.4% for men and  
158 sharply increased to 45.0% for women. Among individuals with 9-12 years of formal education, the

159 positivity rate dropped to 11.2% in men and 30.4% in women. For those with >12 years of education, the  
160 seroprevalence was lower in men (11.1%) compared to women (37.5%).

161 Among married male sex workers, the seroprevalence was 15.1%, whereas, for single males, it was  
162 significantly lower at 8.2% (**Table 2**). On the other hand, among female sex workers, married individuals  
163 showed a considerably higher seroprevalence at 35.2%, compared to single females who had a  
164 seroprevalence of 20.0%.

| <b>Sex</b> | <b>Marital Status</b> | <b>Total Participants</b> | <b>Positivity %</b> |
|------------|-----------------------|---------------------------|---------------------|
| Male       | Married               | 523                       | 15.10516            |
| Male       | Single                | 353                       | 8.215297            |
| Female     | Married               | 88                        | 35.22727            |
| Female     | Single                | 35                        | 20                  |

165

## 166 **Identified Risk Factors and Their Relationship to HCV**

### 167 **Seroprevalence**

168 Next, we analyzed the impact of Identified risk factors on HCV seroprevalence in male and female sex  
169 workers (**Table 3**). In the context of shaving practices, individuals shaving at home had a higher overall  
170 HCV seropositivity of 18.97% compared to those using salon services (12.62%) or both (13.27%). This  
171 trend was consistent among men, with 10.81% positivity in those who shaved at home versus 12.58% and  
172 13.54% for those who used salon services and both, respectively. However, for women, the pattern  
173 diverged. Women who shaved at home had a significantly high HCV seropositivity of 33.33%, while  
174 women who used salon services showed seropositivity of 14.29%.

175

| <b>Risk Factor</b>           | <b>Exposure</b> | <b>Sex</b> | <b>Participant Number</b> | <b>HCV Seropositivity %</b> |
|------------------------------|-----------------|------------|---------------------------|-----------------------------|
| Source of Shaving            | Home            | Overall    | 290                       | 18.96551724                 |
|                              | Salon           | Overall    | 610                       | 12.62295082                 |
|                              | Both            | Overall    | 98                        | 13.26530612                 |
|                              | Home            | Men        | 185                       | 10.81081081                 |
|                              | Salon           | Men        | 596                       | 12.58389262                 |
|                              | Both            | Men        | 96                        | 13.54166667                 |
|                              | Home            | Women      | 105                       | 33.33333333                 |
|                              | Salon           | Women      | 14                        | 14.28571429                 |
|                              | Both            | Women      | 2                         | 0                           |
| Sharing of Blade             | Yes             | Overall    | 41                        | 19.5122                     |
|                              | No              | Overall    | 957                       | 14.31557                    |
|                              | Yes             | Men        | 39                        | 20.51282                    |
|                              | No              | Men        | 838                       | 11.93317                    |
|                              | Yes             | Women      | 2                         | 0                           |
|                              | No              | Women      | 119                       | 31.09244                    |
| Sharing of Toothbrush        | Yes             | Overall    | 37                        | 13.51351                    |
|                              | No              | Overall    | 963                       | 14.64174                    |
|                              | Yes             | Men        | 36                        | 11.11111                    |
|                              | No              | Men        | 841                       | 12.36623                    |
|                              | Yes             | Women      | 1                         | 100                         |
|                              | No              | Women      | 122                       | 30.32787                    |
| History of Surgery           | Yes             | Overall    | 150                       | 18.66667                    |
|                              | No              | Overall    | 850                       | 13.88235                    |
|                              | Yes             | Men        | 137                       | 13.86861                    |
|                              | No              | Men        | 740                       | 12.02703                    |
|                              | Yes             | Women      | 13                        | 69.23077                    |
|                              | No              | Women      | 110                       | 26.36364                    |
| History of Blood Transfusion | Yes             | Overall    | 178                       | 17.97753                    |
|                              | No              | Overall    | 822                       | 13.86861                    |
|                              | Yes             | Men        | 164                       | 15.2439                     |
|                              | No              | Men        | 713                       | 11.64095                    |
|                              | Yes             | Women      | 14                        | 50                          |
|                              | No              | Women      | 109                       | 28.44037                    |
| History of Injection         | Yes             | Overall    | 189                       | 15.34392                    |
|                              | No              | Overall    | 811                       | 14.42663                    |
|                              | Yes             | Men        | 168                       | 11.30952                    |
|                              | No              | Men        | 709                       | 12.55289                    |
|                              | Yes             | Women      | 21                        | 47.61905                    |
|                              | No              | Women      | 102                       | 27.45098                    |
| History of Dental Procedure  | Yes             | Overall    | 79                        | 22.78481                    |
|                              | No              | Overall    | 921                       | 13.89794                    |

|                            |     |         |     |          |
|----------------------------|-----|---------|-----|----------|
|                            | Yes | Men     | 70  | 18.57143 |
|                            | No  | Men     | 807 | 11.772   |
|                            | Yes | Women   | 9   | 55.55556 |
|                            | No  | Women   | 114 | 28.94737 |
| History of Hospitalization | Yes | Overall | 147 | 21.76871 |
|                            | No  | Overall | 853 | 13.3646  |
|                            | Yes | Men     | 132 | 17.42424 |
|                            | No  | Men     | 745 | 11.4094  |
|                            | Yes | Women   | 15  | 60       |
|                            | No  | Women   | 108 | 26.85185 |
| History of Drug Abuse      | Yes | Overall | 14  | 21.42857 |
|                            | No  | Overall | 986 | 14.50304 |
|                            | Yes | Men     | 12  | 25       |
|                            | No  | Men     | 865 | 12.13873 |
|                            | Yes | Women   | 2   | 0        |
|                            | No  | Women   | 121 | 31.40496 |

176

177 Sharing of blades revealed a slightly higher overall HCV seropositivity among individuals men who  
 178 shared blades had significantly higher seropositivity (20.51%) than those who did not (11.93%). For  
 179 sharing toothbrushes, the overall HCV seropositivity was lower in those who shared (13.51%) than those  
 180 who did not (14.64%).

181 History of surgery showed a pattern where individuals with a surgical history had higher overall HCV  
 182 seropositivity (18.67%) than those without (13.88%). This was mirrored in men with a history of surgery  
 183 (13.87%) versus those without (12.03%). However, among women, a striking difference was observed.  
 184 Women with a surgical history exhibited an alarmingly high HCV seropositivity rate of 69.23%, whereas  
 185 women without a surgical history demonstrated a seropositivity rate of 26.36%.

186 The pattern of other risk factors such as blood transfusion history, history of injections, dental procedures,  
 187 hospitalization, and drug abuse revealed similar patterns. All risk factors showed higher HCV  
 188 seropositivity rates among those exposed to the risk factor, with the differences being more pronounced  
 189 among women compared to men. Notably, these differences among women should be interpreted with  
 190 caution due to the smaller sample sizes.

## 191 **Discussion**

192 The presented work studied the seroprevalence of the Hepatitis C Virus (HCV) among sex workers in  
193 Pakistan. This work aimed to examine the extent of HCV exposure within this marginalized community,  
194 identify any disparities in seroprevalence between sexes, and study the association of seroprevalence with  
195 various demographic characteristics and risk factors. Our study population predominantly consisted of  
196 men (87.7%), with women making up 12.3%. The overall seroprevalence of HCV antibodies, indicative  
197 of exposure to the virus, was 15%. Notably, a marked gender disparity was observed, with male sex  
198 workers exhibiting a seroprevalence of 12%, while their female counterparts showed a significantly  
199 higher seroprevalence of 31%. We also found variations in seroprevalence across different age groups,  
200 educational levels, and marital statuses. It was observed that increasing age, lower education, and  
201 marriage were associated with higher seroprevalence.

202 Studies focusing on HCV seroprevalence among sex workers have yielded diverse results. For example,  
203 research conducted in Thailand (21) revealed a relatively low HCV prevalence of 2.3% among migrant  
204 sex workers, contrasting sharply with a Glasgow-based study (15) that reported a striking 81% HCV  
205 seroprevalence among female street sex workers who inject drugs. Meanwhile, a Canadian study (14)  
206 documented a baseline prevalence of 42.7% among female sex workers. A study from Brazil [4] also  
207 indicated a higher exposure prevalence to HCV, at 7.7%, among female sex workers. These findings  
208 underscore the significant variability in HCV seroprevalence across different regions and populations of  
209 sex workers, shedding light on the impact of various risk factors, demographic characteristics, and  
210 regional healthcare infrastructures.

211 Our study found pronounced disparities in HCV seroprevalence between male and female sex workers.  
212 This finding aligns with existing literature documenting elevated rates of HCV seroprevalence among  
213 female sex workers (14). The heightened vulnerability of female sex workers is often a byproduct of  
214 precarious working conditions, limited access to healthcare, and an increased likelihood of injecting drug

215 use—each a significant contributor to elevated HCV risk (17). The intersection of sex work and drug use  
216 is particularly accentuated among female sex workers (14, 17), amplifying their susceptibility to HCV  
217 infection. The multifaceted, gender-specific risks inherent in sex work necessitate the development of  
218 tailored interventions and harm reduction strategies. These strategies should address the unique needs and  
219 challenges faced by female sex workers, particularly in enhancing access to HCV prevention and  
220 healthcare services.

221 Several studies have reported high HCV seroprevalence among men who have sex with men (MSM) (22-  
222 24). However, only a few studies have undertaken a comparative analysis of sex-based differences among  
223 sex workers (25, 26). There is a pressing need for additional research to further elucidate the variations in  
224 HCV prevalence rates based on gender within the sex worker population.

225 We observed an increase in HCV seropositivity with advancing age, particularly among female sex  
226 workers. This demographic exhibited a sharper rise and consistently higher seroprevalence than their male  
227 counterparts. This age-related increase in HCV seropositivity is consistent with several other studies (9),  
228 suggesting a cumulative risk of exposure and infection over time (9). The more pronounced increase  
229 among female sex workers could be attributed to many factors, including prolonged exposure to high-risk  
230 environments, compounded vulnerabilities, and potential barriers to accessing preventive services and  
231 healthcare.

232 A noticeable relationship was observed between years of formal education and HCV seroprevalence  
233 among the participating sex workers. Individuals with lower educational levels exhibited higher rates of  
234 HCV seroprevalence, a markedly pronounced trend among female sex workers. This observed association  
235 between education and HCV seroprevalence underscores the importance of addressing educational  
236 disparities as a critical determinant of health. Tailored interventions to enhance health literacy and  
237 improved access to education, are essential for reducing HCV seroprevalence and promoting health equity  
238 within this population.

239 Our data indicates a notable difference in HCV seroprevalence in relation to marital status, particularly  
240 among female sex workers. Married female sex workers manifested a considerably elevated  
241 seroprevalence compared to their single counterparts. One plausible explanation for this occurrence could  
242 be that married individuals may face complexities related to spousal relationships, familial  
243 responsibilities, and societal expectations, potentially influencing their risk behaviors and access to  
244 healthcare. The dynamics of marital relationships, including the potential for intimate partner violence  
245 and power imbalances, may limit the autonomy of married female sex workers in negotiating safer  
246 practices and accessing preventive services. Additionally, married female sex workers might experience  
247 dual sources of stigma and discrimination—both as sex workers and as married women engaged in sex  
248 work. This compounded stigma can pose barriers to healthcare access, hinder utilization of harm  
249 reduction services, and exacerbate vulnerabilities to infections such as HCV (27, 28).

250 This study also examined the impact of various identified risk factors on HCV seroprevalence. The  
251 sharing of blades emerged as a significant risk factor, with individuals engaging in this practice  
252 demonstrating higher seropositivity. This observation aligns with the established knowledge that sharing  
253 sharp objects can facilitate the transmission of blood-borne viruses like HCV, underscoring the  
254 importance of promoting safe practices and awareness. Individuals with a surgical history, especially  
255 women, manifested alarmingly high HCV seropositivity rates. This finding accentuates the critical role of  
256 medical procedures as potential avenues for HCV transmission, necessitating stringent infection control  
257 measures and adherence to sterilization protocols in healthcare settings. The exploration of other risk  
258 factors such as blood transfusion history, history of injections, dental procedures, hospitalization, and  
259 drug abuse revealed analogous patterns. These factors contributed to elevated HCV seropositivity rates,  
260 with the disparities being more pronounced among women. The heightened vulnerability of women to  
261 these risk factors necessitates a gender-sensitive approach to addressing HCV transmission.

262 One of the major limitations of our study is the smaller sample size of female participants. This  
263 disproportion in representation between male and female participants could potentially introduce bias and

264 affect the robustness of the associations and patterns observed, particularly in relation to gender-specific  
265 findings. This smaller female cohort size limits the generalizability of our findings to the broader  
266 population of female sex workers in Pakistan and beyond. The gender-specific disparities and trends  
267 observed in our study warrant further exploration through more extensive, more representative studies  
268 focusing on female sex workers. Another potential limitation of our study is the self-reported data, which  
269 may be subject to recall bias. Despite these limitations, our study contributes valuable insights into the  
270 HCV seroprevalence among sex workers in Pakistan, laying the groundwork for future research and  
271 interventions tailored to address the unique needs and vulnerabilities of this population. The insights  
272 garnered from this research underscore the pressing need for concerted action and commitment to address  
273 the health disparities faced by sex workers and to foster an environment conducive to their well-being and  
274 access to healthcare.

## 275 **Acknowledgments**

276 We would like to offer our gratitude to all the community members who helped us in sampling and  
277 collecting data from this marginalized community.

## 278 **Declarations**

### 279 **Generative AI**

280 *During the preparation of this work the author(s) used ChatGPT for editing the manuscript. After using this tool, the*  
281 *author(s) reviewed and edited the content as needed and take(s) full responsibility for the content of the publication.*



## 282 **References**

- 283 1. Alter MJ. Epidemiology of hepatitis C virus infection. *World journal of gastroenterology: WJG*.  
284 2007;13(17):2436.
- 285 2. Lanini S, Easterbrook PJ, Zumla A, Ippolito G. Hepatitis C: global epidemiology and strategies  
286 for control. *Clin Microbiol Infect*. 2016;22(10):833-8.
- 287 3. Petruzzello A, Marigliano S, Loquercio G, Cozzolino A, Cacciapuoti C. Global epidemiology of  
288 hepatitis C virus infection: An up-date of the distribution and circulation of hepatitis C virus genotypes.  
289 *World J Gastroenterol*. 2016;22(34):7824-40.
- 290 4. Lewis KC, Barker LK, Jiles R, Gupta N. Estimated prevalence and awareness of hepatitis C virus  
291 infection among U.S. adults- National Health and Nutrition Examination Survey, January 2017-March  
292 2020. *Clin Infect Dis*. 2023.
- 293 5. Daw M, El-Bouzedi A, Ahmed M, Dau A, Agnan M, Edrah A. Geographic integration of hepatitis  
294 C virus: A global threat. *World Journal of Virology*. 2016;12:1-13.
- 295 6. Abdelhakam SA, Othman MA. Social, cultural, and political factors influencing HCV in  
296 developing countries. *Hepatitis C in Developing Countries: Elsevier*; 2018. p. 33-8.
- 297 7. Edmunds BL, Miller ER, Tsourtos G. The distribution and socioeconomic burden of Hepatitis C  
298 virus in South Australia: a cross-sectional study 2010-2016. *BMC Public Health*. 2019;19(1):527.
- 299 8. Ryerson AB, Schillie S, Barker LK, Kupronis BA, Wester C. Vital Signs: Newly Reported Acute  
300 and Chronic Hepatitis C Cases - United States, 2009-2018. *MMWR Morb Mortal Wkly Rep*.  
301 2020;69(14):399-404.
- 302 9. Reid M, Price JC, Tien PC. Hepatitis C Virus Infection in the Older Patient. *Infect Dis Clin North*  
303 *Am*. 2017;31(4):827-38.
- 304 10. Yue T, Zhang Q, Cai T, Xu M, Zhu H, Pourkarim MR, et al. Trends in the disease burden of HBV  
305 and HCV infection in China from 1990-2019. *Int J Infect Dis*. 2022;122:476-85.

- 306 11. El-Serag HB, Kramer J, Duan Z, Kanwal F. Epidemiology and outcomes of hepatitis C infection  
307 in elderly US Veterans. *J Viral Hepat.* 2016;23(9):687-96.
- 308 12. Prati D. Transmission of hepatitis C virus by blood transfusions and other medical procedures: a  
309 global review. *J Hepatol.* 2006;45(4):607-16.
- 310 13. Miranda N, de Souza RL, Monteiro JC, Costa IB, Siravenha LQ, da Luz ALB, et al.  
311 Seroprevalence of HBV and HCV in female sex workers from four cities in the state of Pará, northern  
312 Brazil. *Journal of medical virology.* 2021;93(6):3730-7.
- 313 14. Goldenberg SM, Montaner J, Braschel M, Socias E, Guillemi S, Shannon K. Dual sexual and  
314 drug-related predictors of hepatitis C incidence among sex workers in a Canadian setting: gaps and  
315 opportunities for scale-up of hepatitis C virus prevention, treatment, and care. *Int J Infect Dis.*  
316 2017;55:31-7.
- 317 15. Taylor A, Hutchinson SJ, Gilchrist G, Cameron S, Carr S, Goldberg DJ. Prevalence and  
318 determinants of hepatitis C virus infection among female drug injecting sex workers in Glasgow. *Harm  
319 reduction journal.* 2008;5:11.
- 320 16. Uuskula A, Fischer K, Raudne R, Kilgi H, Krylov R, Salminen M, et al. A study on HIV and  
321 hepatitis C virus among commercial sex workers in Tallinn. *Sex Transm Infect.* 2008;84(3):189-91.
- 322 17. Socias ME, Shannon K, Montaner JS, Guillemi S, Dobrer S, Nguyen P, et al. Gaps in the hepatitis  
323 C continuum of care among sex workers in Vancouver, British Columbia: Implications for voluntary  
324 hepatitis C virus testing, treatment and care. *Can J Gastroenterol Hepatol.* 2015;29(8):411-6.
- 325 18. Waheed Y, Shafi T, Safi SZ, Qadri I. Hepatitis C virus in Pakistan: a systematic review of  
326 prevalence, genotypes and risk factors. *World J Gastroenterol.* 2009;15(45):5647-53.
- 327 19. Saleem NH, Adrien A, Razaque A. Risky sexual behavior, knowledge of sexually transmitted  
328 infections and treatment utilization among a vulnerable population in Rawalpindi, Pakistan. *Southeast  
329 Asian J Trop Med Public Health.* 2008;39(4):642-8.

- 330 20. Ahsan A, Khan AZ, Javed H, Mirza S, Chaudhary SU, Shahzad-UI-Hussan S. Estimation of  
331 hepatitis C prevalence in the Punjab province of Pakistan: A retrospective study on general population.  
332 PLoS One. 2019;14(4):e0214435.
- 333 21. Hongjaisee S, Khamduang W, Sripan P, Choyrum S, Thepbundit V, Kosashunhanan N, et al.  
334 Uncommon hepatitis C virus among migrant sex workers in Chiangmai, Thailand. *Clinical microbiology  
335 and infection : the official publication of the European Society of Clinical Microbiology and Infectious  
336 Diseases*. 2021;27(10):1523-5.
- 337 22. Jin F, Dore GJ, Matthews G, Luhmann N, Macdonald V, Bajis S, et al. Prevalence and incidence  
338 of hepatitis C virus infection in men who have sex with men: a systematic review and meta-analysis.  
339 *Lancet Gastroenterol Hepatol*. 2021;6(1):39-56.
- 340 23. Hoornenborg E, Achterbergh RCA, Schim van der Loeff MF, Davidovich U, Hogewoning A, de  
341 Vries HJC, et al. MSM starting preexposure prophylaxis are at risk of hepatitis C virus infection. *AIDS*.  
342 2017;31(11):1603-10.
- 343 24. Tirmizi R, Munir R, Zaidi N. Trends in Hepatitis C Virus Seroprevalence and Associated Risk  
344 Factors among MSM in Pakistan: Insights from a Community-Based Study. medRxiv.  
345 2023:2023.09.19.23295785.
- 346 25. Kassak K, Mahfoud Z, Kreidieh K, Shamra S, Afifi R, Ramia S. Hepatitis B virus and hepatitis C  
347 virus infections among female sex workers and men who have sex with men in Lebanon: prevalence, risk  
348 behaviour and immune status. *Sex Health*. 2011;8(2):229-33.
- 349 26. Saludes V, Folch C, Morales-Carmona A, Ferrer L, Fernandez-Lopez L, Munoz R, et al.  
350 Community-based screening of hepatitis C with a one-step RNA detection algorithm from dried-blood  
351 spots: Analysis of key populations in Barcelona, Spain. *J Viral Hepat*. 2018;25(3):236-44.
- 352 27. Khan S, Shah S, Ashraf H. Predictive factors for acquiring HCV infection in the population  
353 residing in high endemic, resource-limited settings. *J Family Med Prim Care*. 2021;10(1):167-74.

354 28. Rashti R, Alavian SM, Moradi Y, Sharafi H, Mohamadi Bolbanabad A, Roshani D, et al. Global  
355 prevalence of HCV and/or HBV coinfections among people who inject drugs and female sex workers who  
356 live with HIV/AIDS: a systematic review and meta-analysis. Arch Virol. 2020;165(9):1947-58.

357

**Figure 1**

**(a) Overall**

■ Positive % ■ Negative %

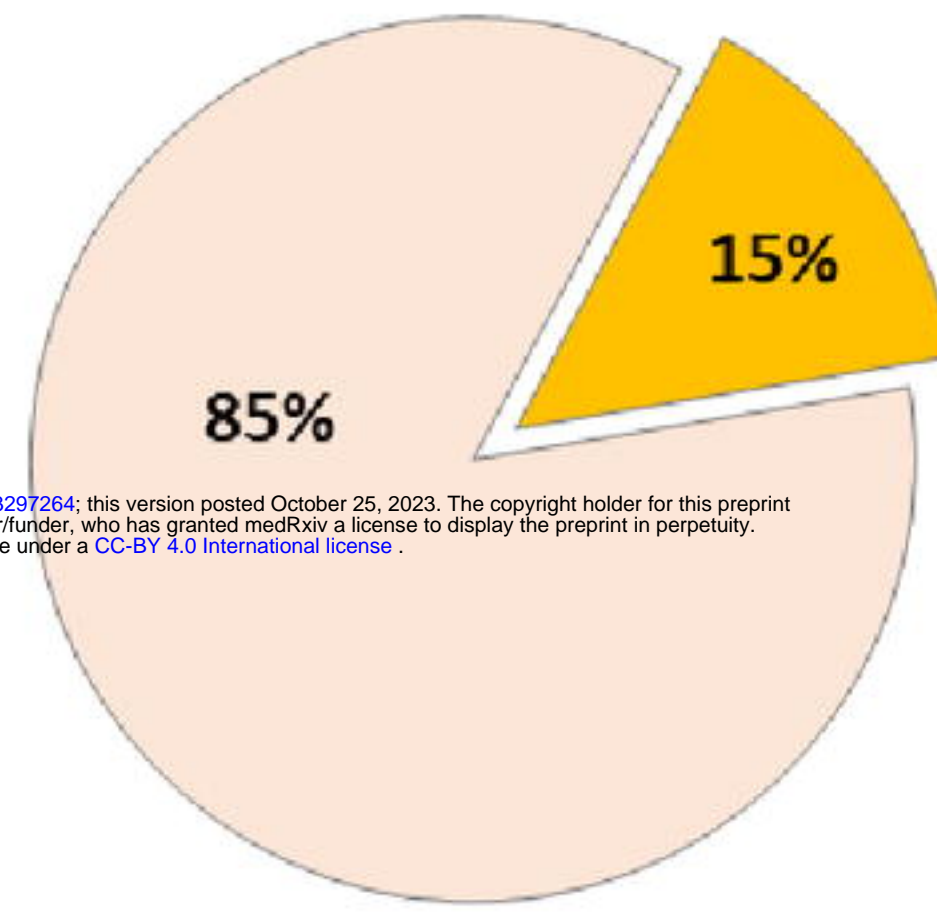

**(b) Male**

■ Positive % ■ Negative %

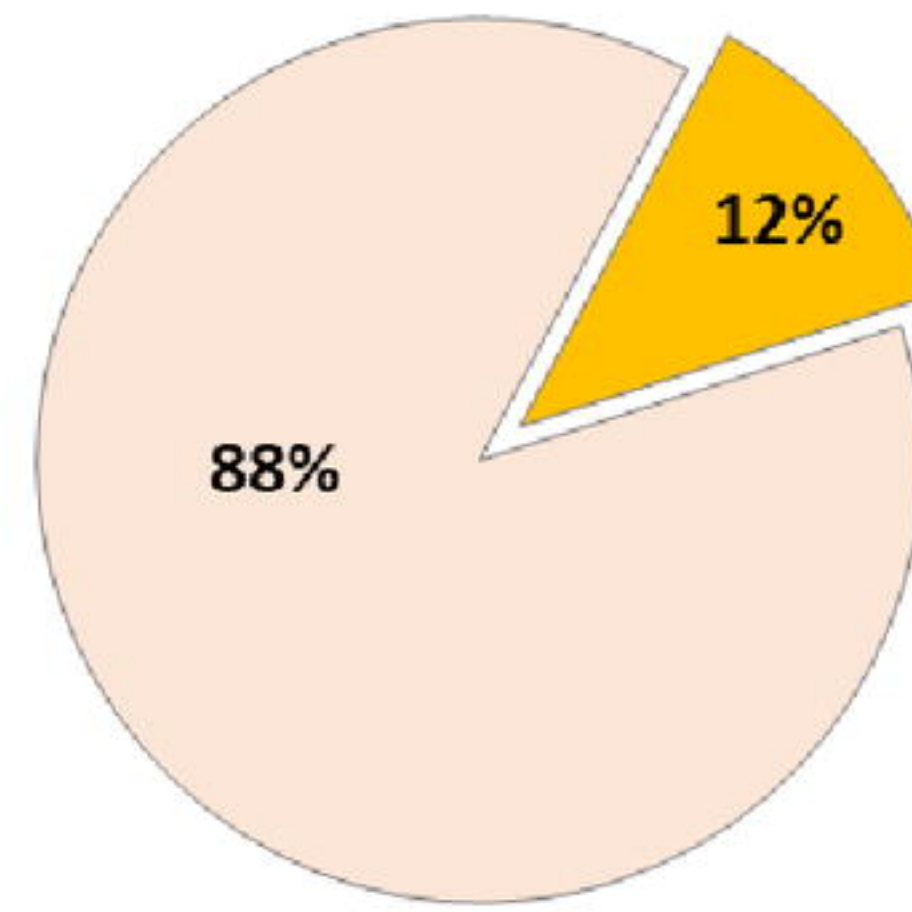

**(c) Female**

■ Positive % ■ Negative %

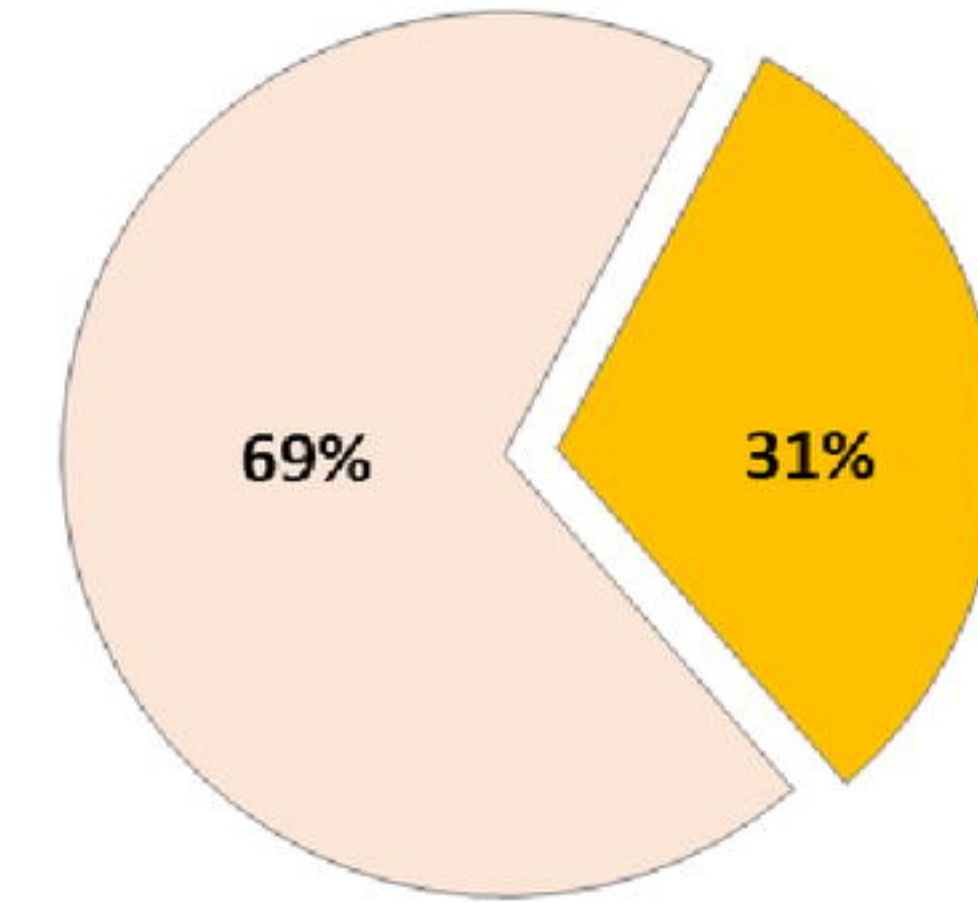

medRxiv preprint doi: <https://doi.org/10.1101/2023.10.19.23297264>; this version posted October 25, 2023. The copyright holder for this preprint (which was not certified by peer review) is the author/funder, who has granted medRxiv a license to display the preprint in perpetuity. It is made available under a [CC-BY 4.0 International license](#).

**Figure 2**

**(a) Overall**

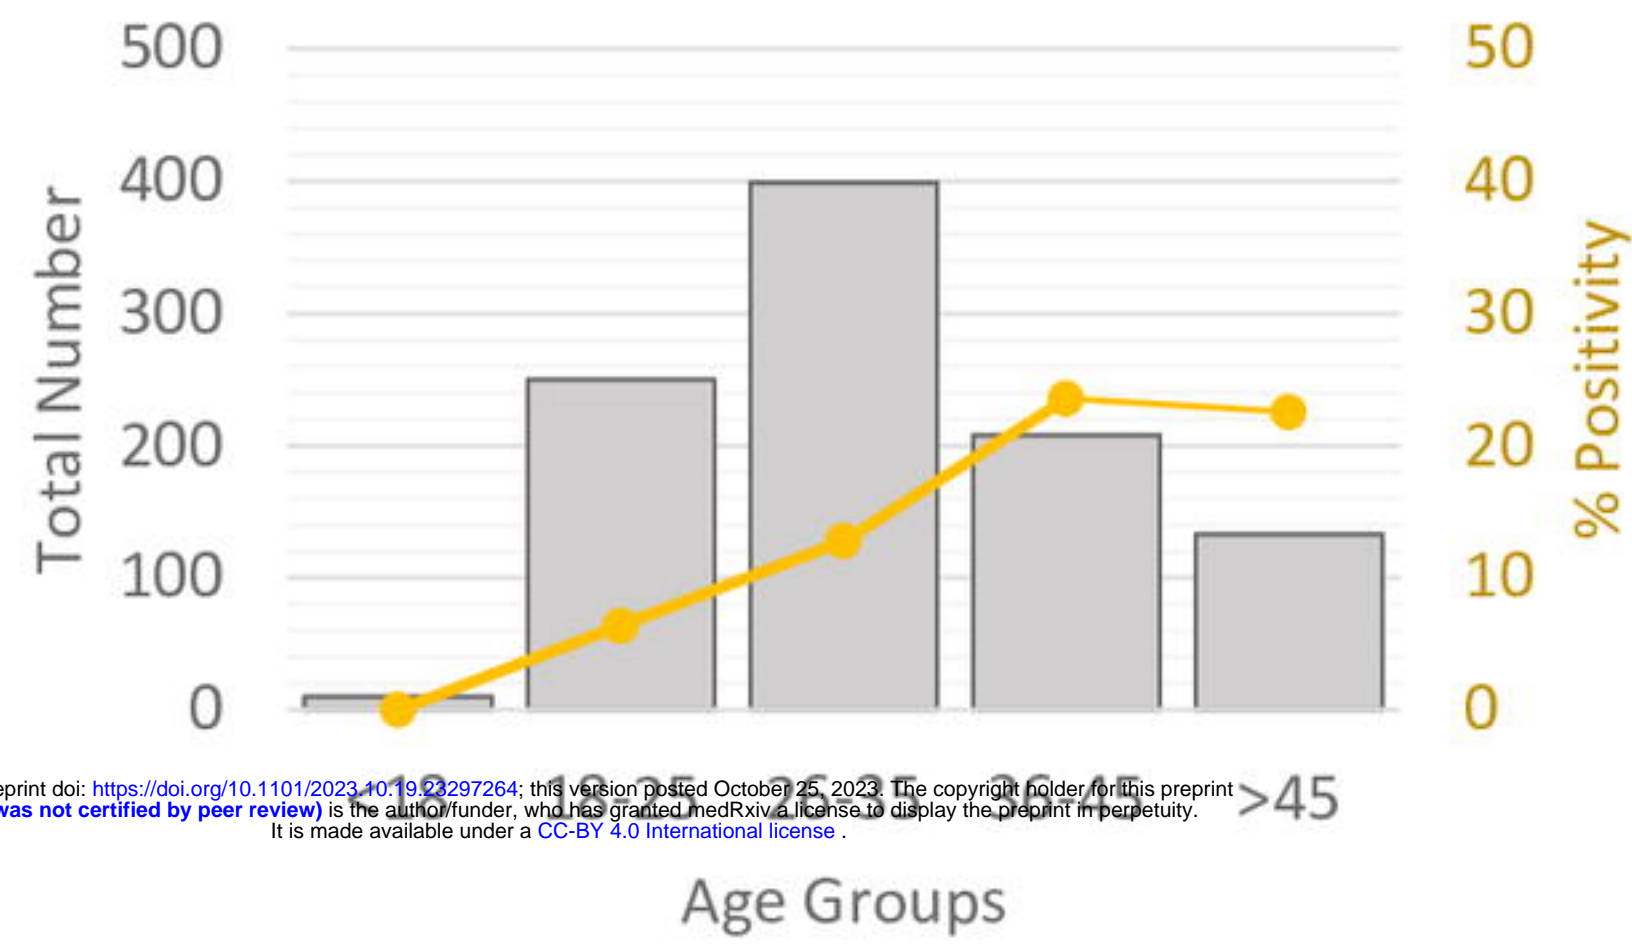

**(b) Male**

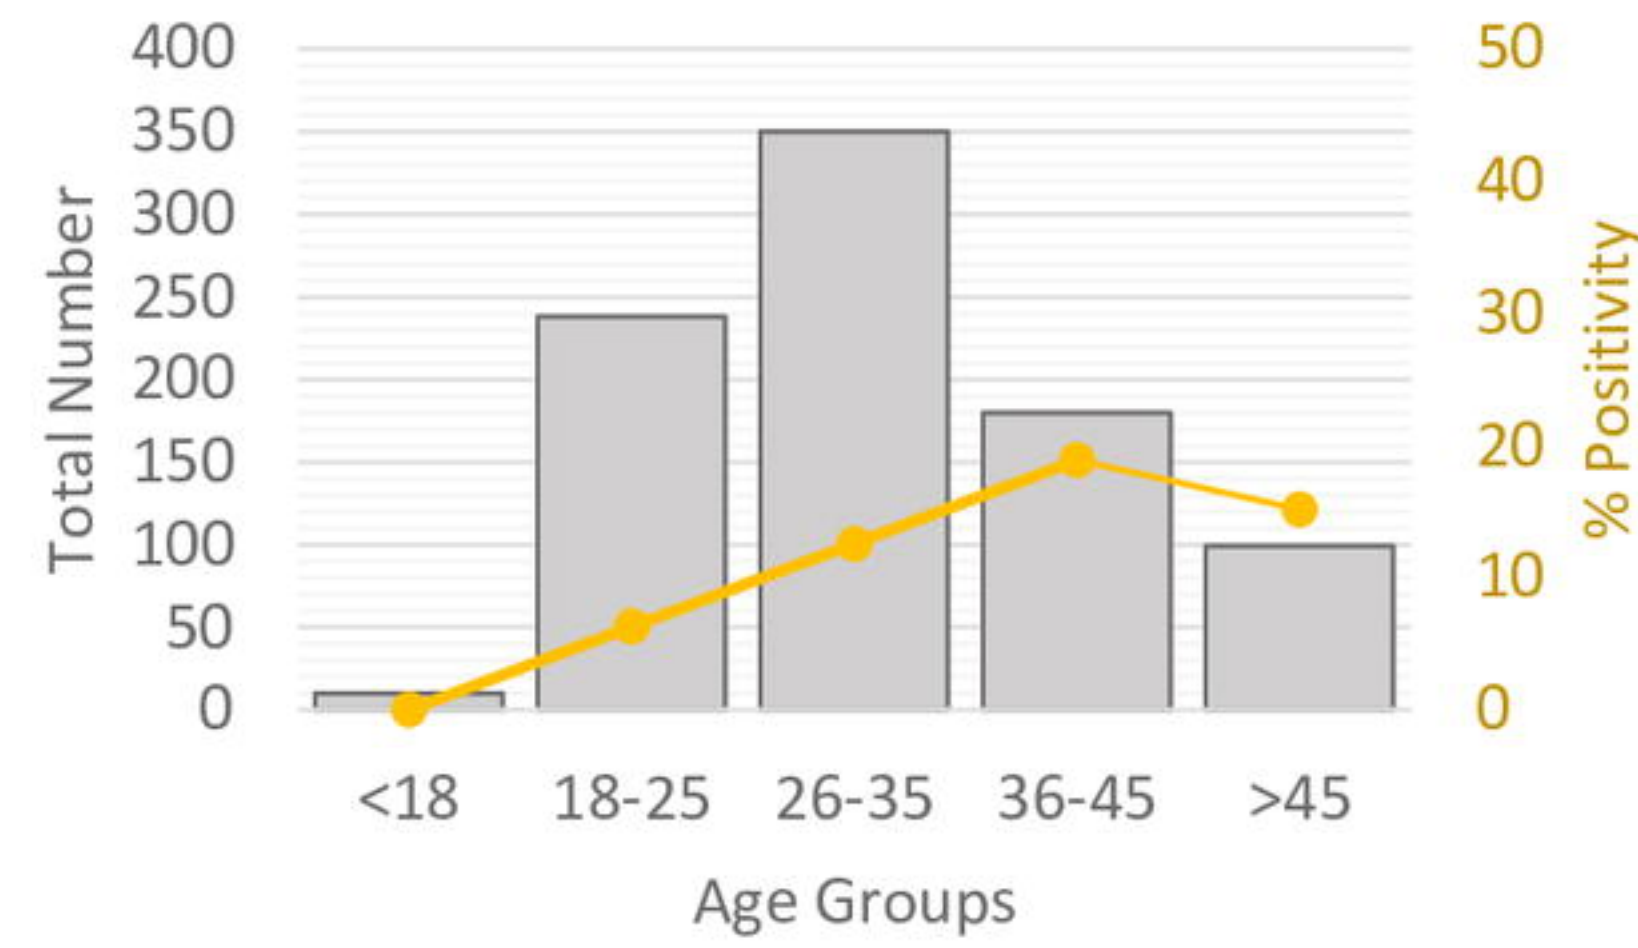

**(c) Female**

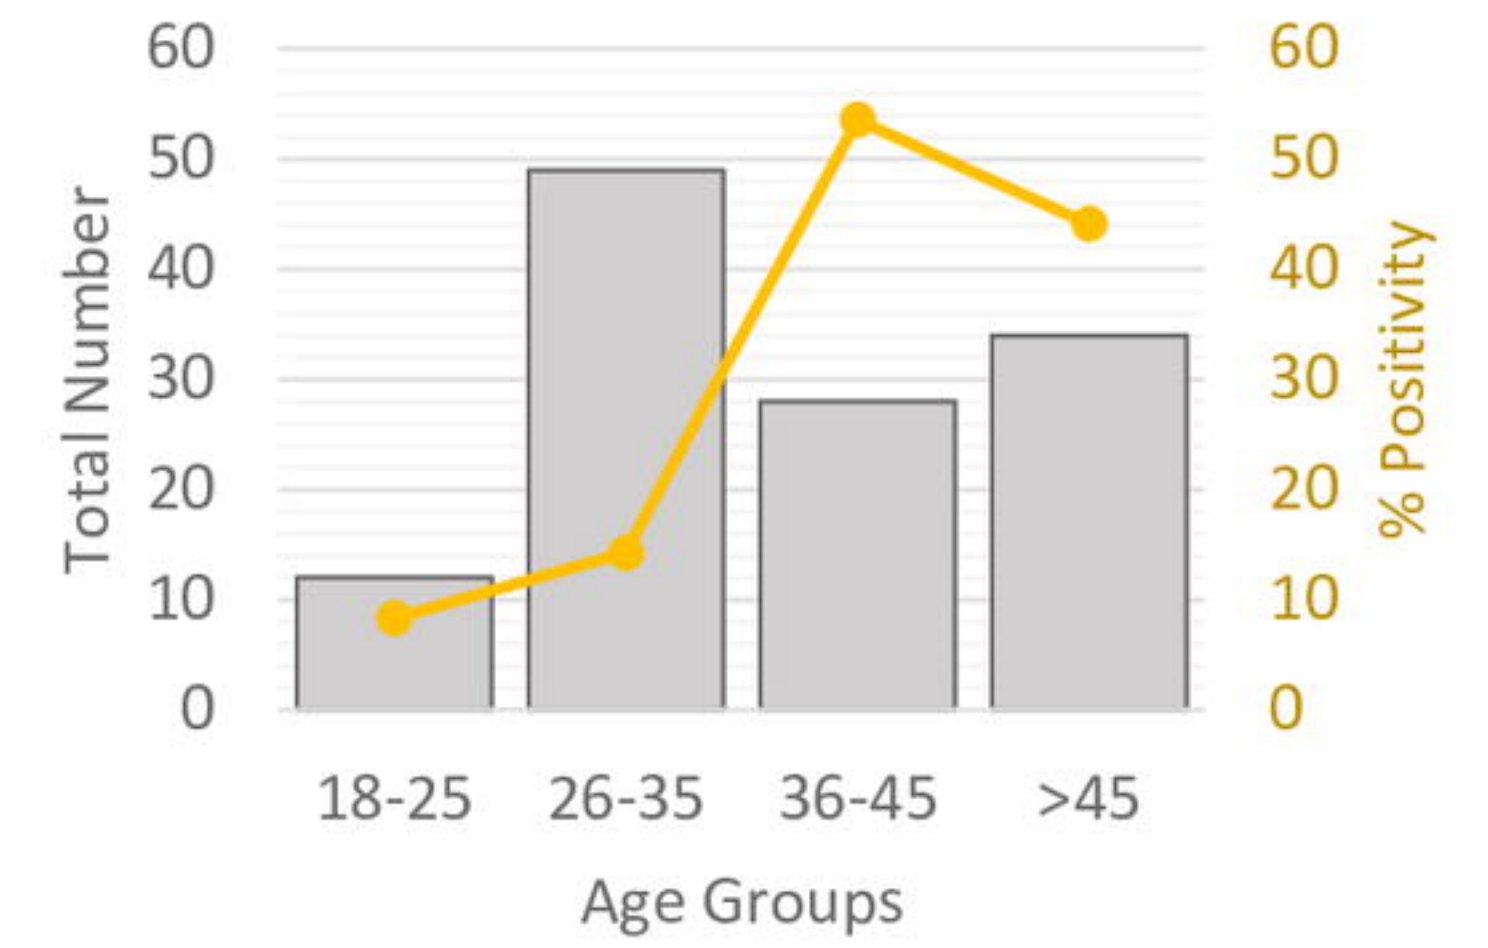

**(d) Overall**

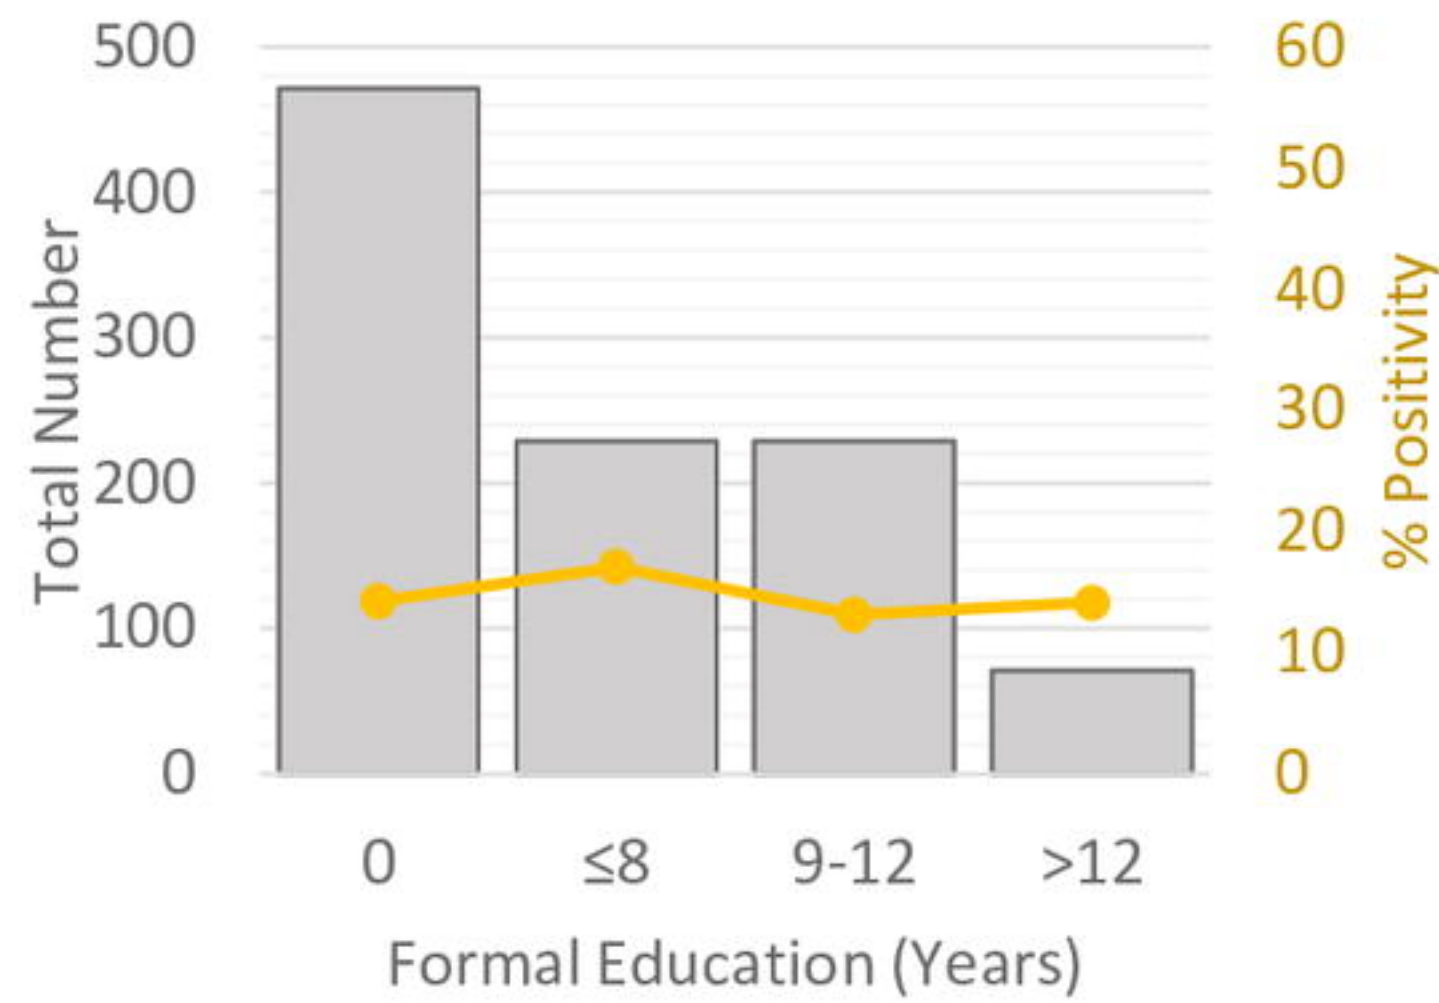

**(e) Male**

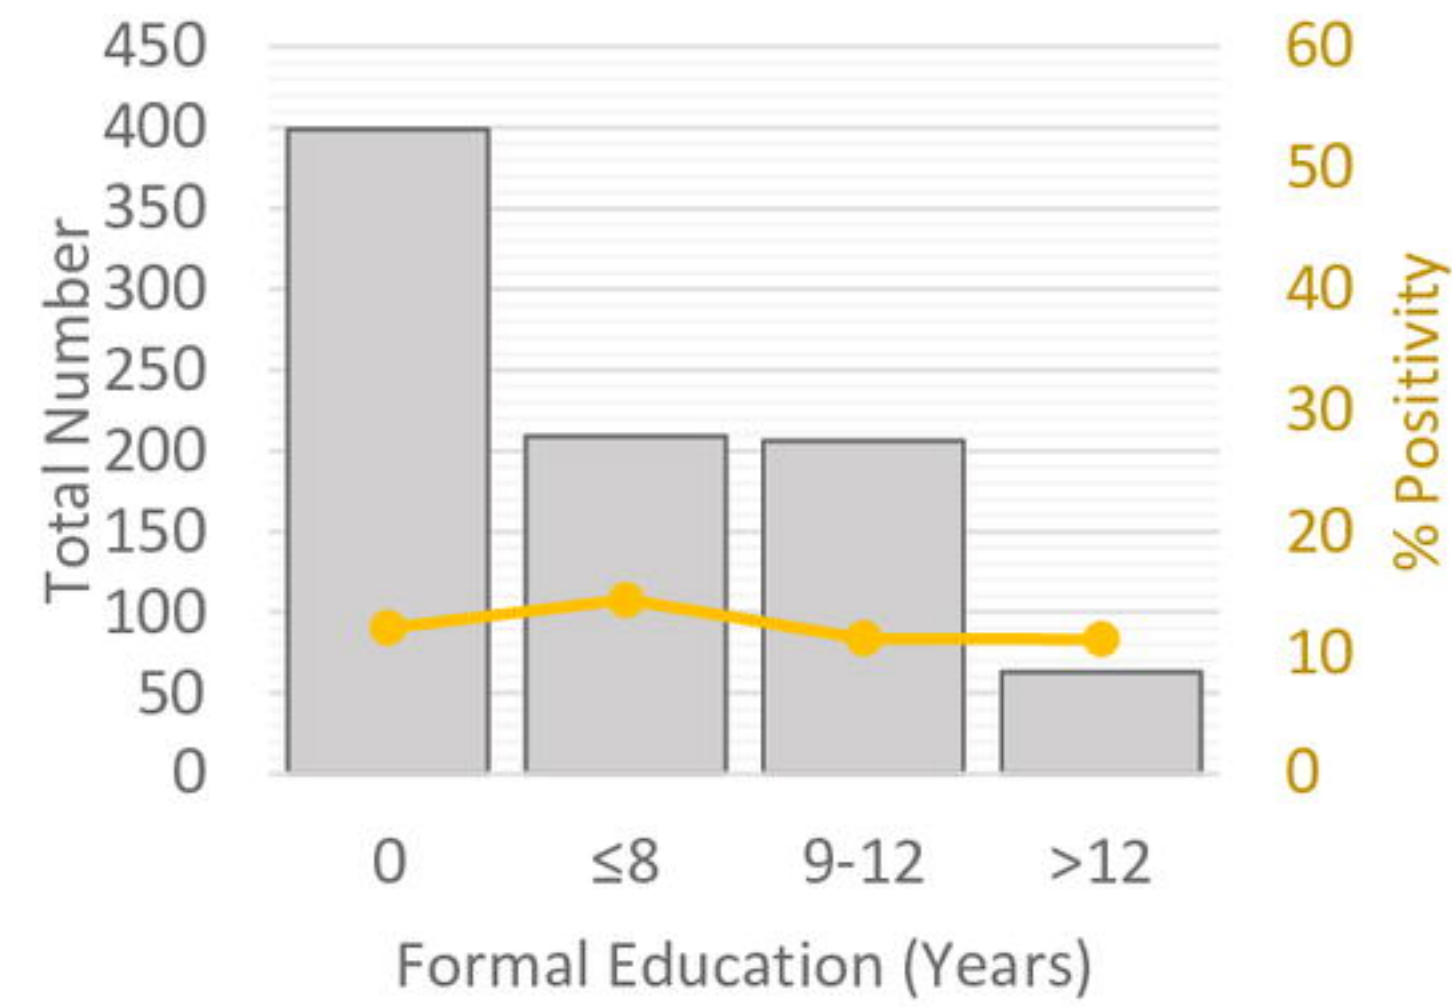

**(f) Female**

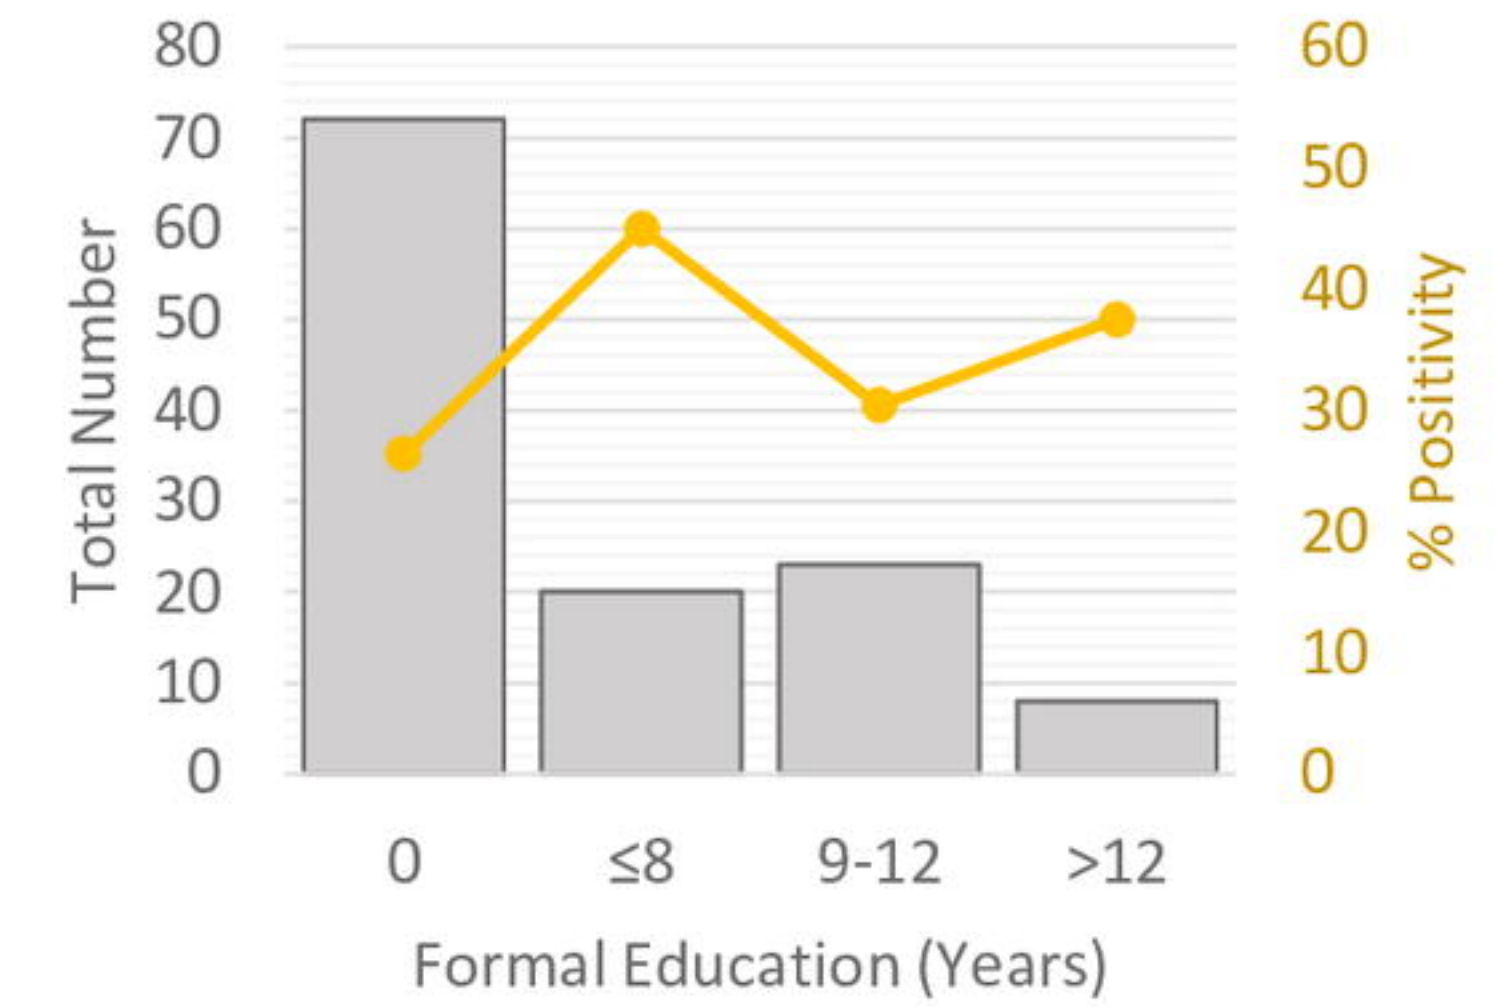

medRxiv preprint doi: <https://doi.org/10.1101/2023.10.19.2297264>; this version posted October 25, 2023. The copyright holder for this preprint (which was not certified by peer review) is the author/funder, who has granted medRxiv a license to display the preprint in perpetuity. It is made available under a [CC-BY 4.0 International license](https://creativecommons.org/licenses/by/4.0/).
